# Supplementary material for: Evolutionary history of Chaetognatha inferred from molecular and morphological data: a case study for body plan simplification
Source: PubMed Central journal article supplement (PMC4254178; doi:10.1186/s12983-014-0084-7), 2014-11-21

**A**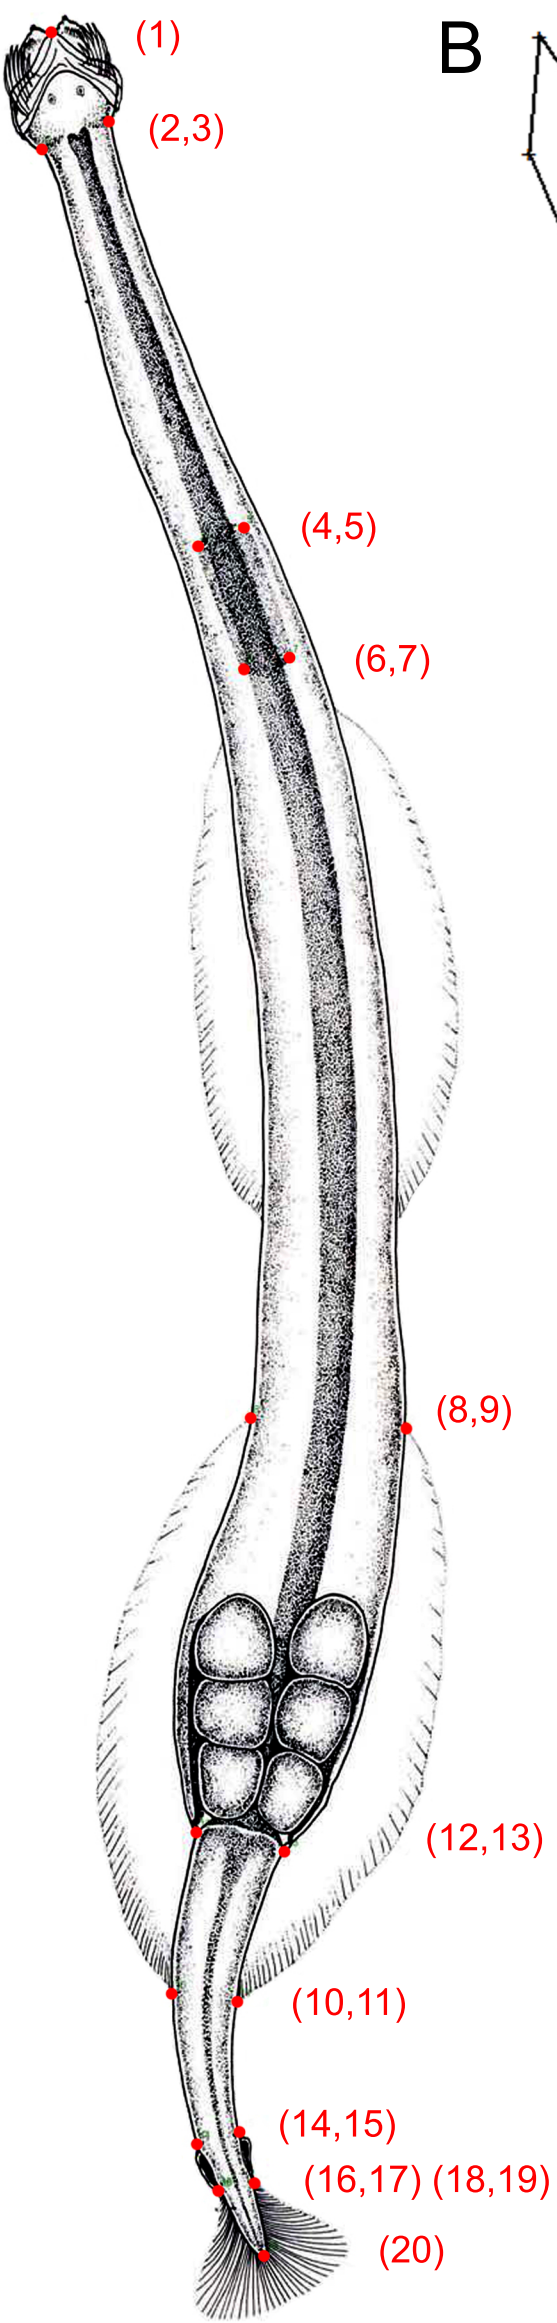**B**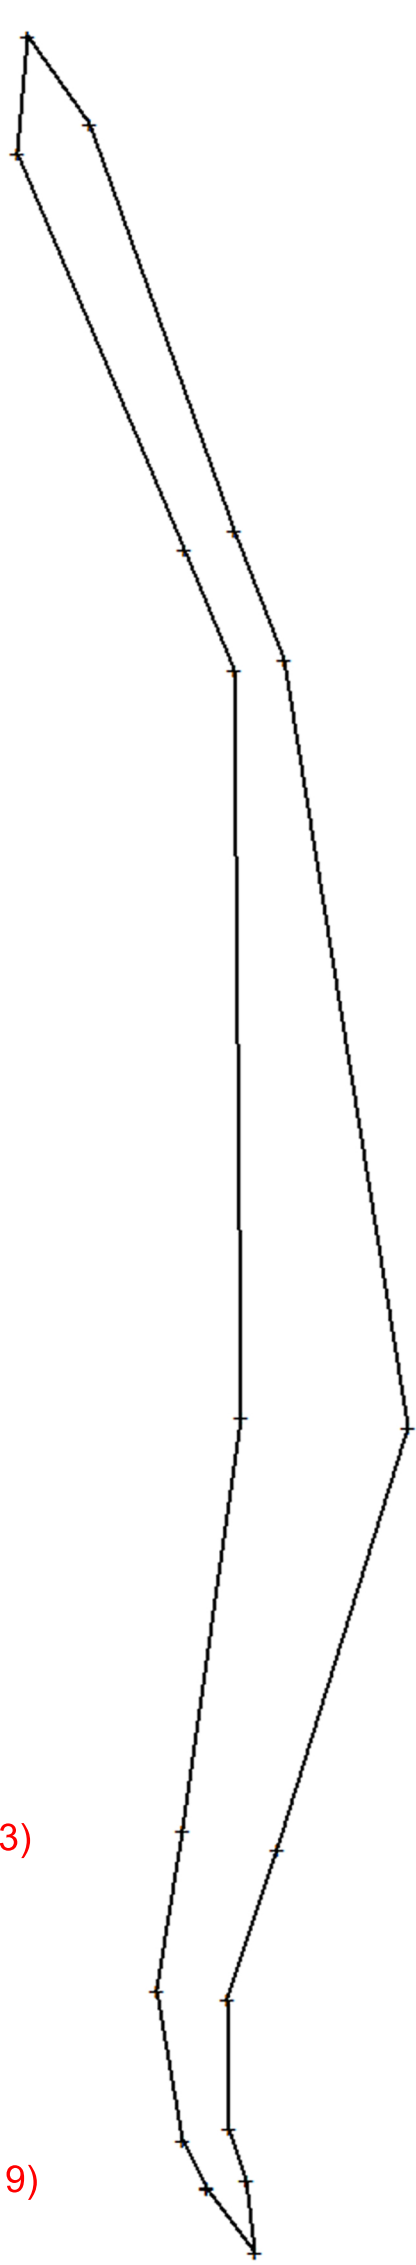**C**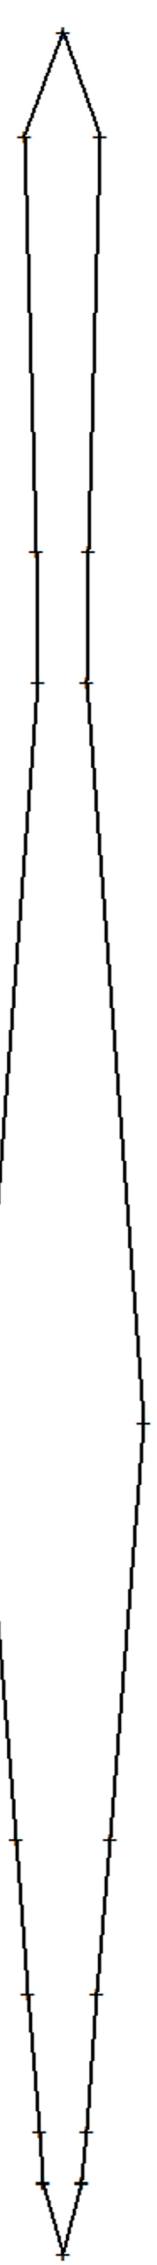

Supplement: 12983_2014_84_MOESM5_ESM.pdf [file 12983_2014_84_MOESM5_ESM.pdf]
